# Supplementary material for: Packing polymorphism of a conformationally flexible molecule (aprepitant)
Source: Royal Society of Chemistry journal article supplement (doi:10.1039/b805438j), 2008-01-01
Supplement: b805438j.pdf [file b805438j.pdf]

# Packing Polymorphism of a Conformationally Flexible Molecule (Aprepitant)

Doris E. Braun, Thomas Gelbrich, Volker Kahlenberg, Gerhard Laus, Josef Wieser and  
Ulrich J. Griesser\*

## Electronic Supporting Information

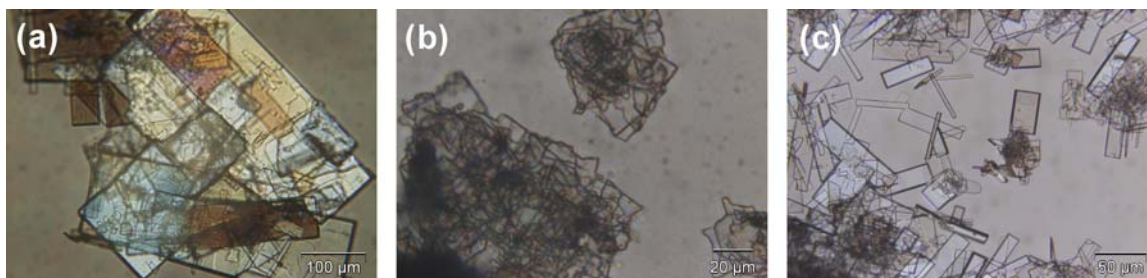

**Figure S1.** Light photomicrographs of aprepitant polymorphs at room temperature (a) form I°, (b) form II, and (c) mixture of the two polymorphs: rectangular plates form I°, irregular plates form II.

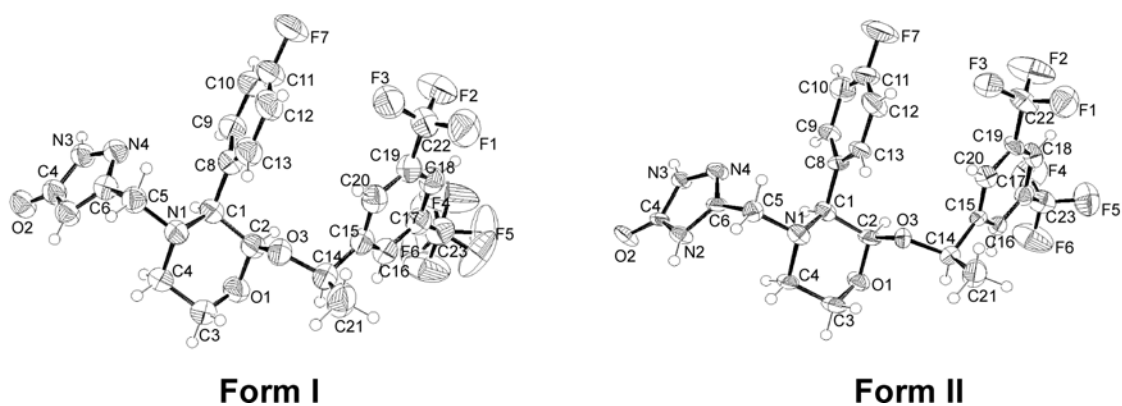

**Figure S2.** Thermal ellipsoide plots of apreitant polymorphs (drawn at 50% probability level).

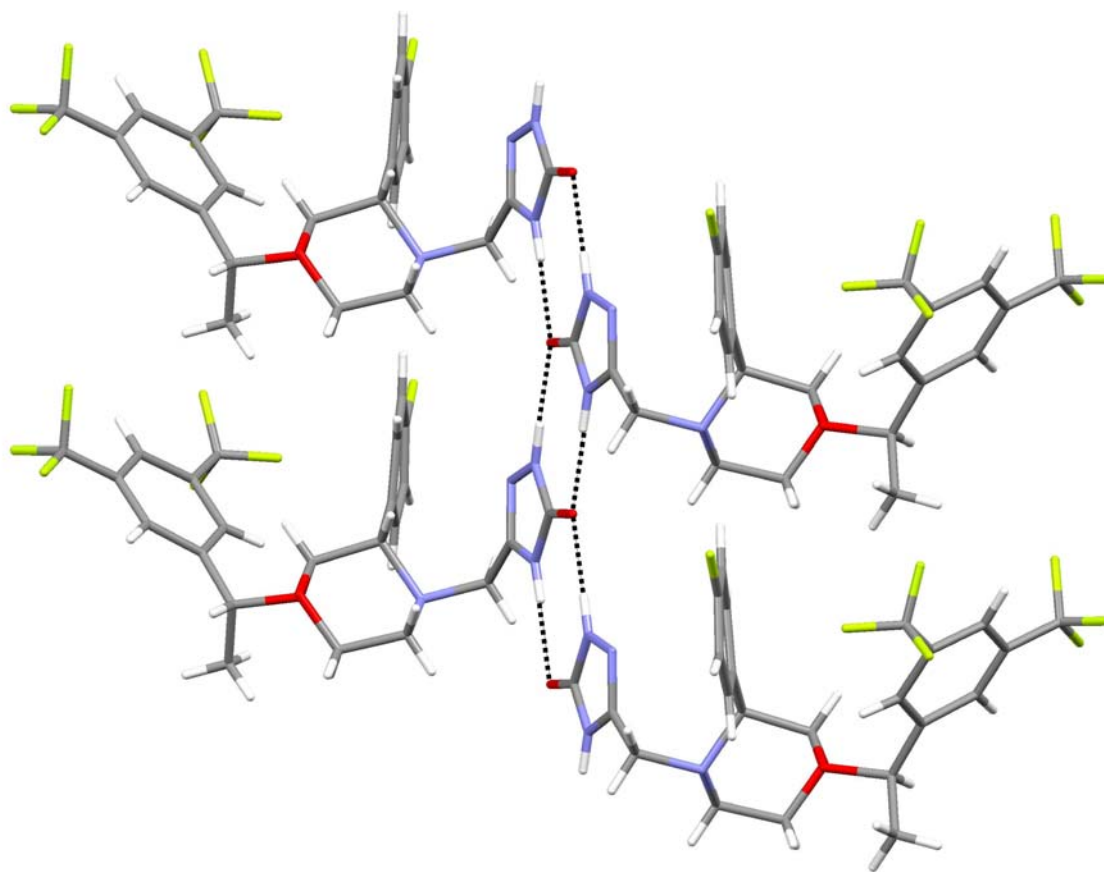

**Figure S3.** Ribbon formed by the strong hydrogen bonds of the aprepitant molecules along *a* in form I° and *b* in form II. 1D ribbon of form II shown.

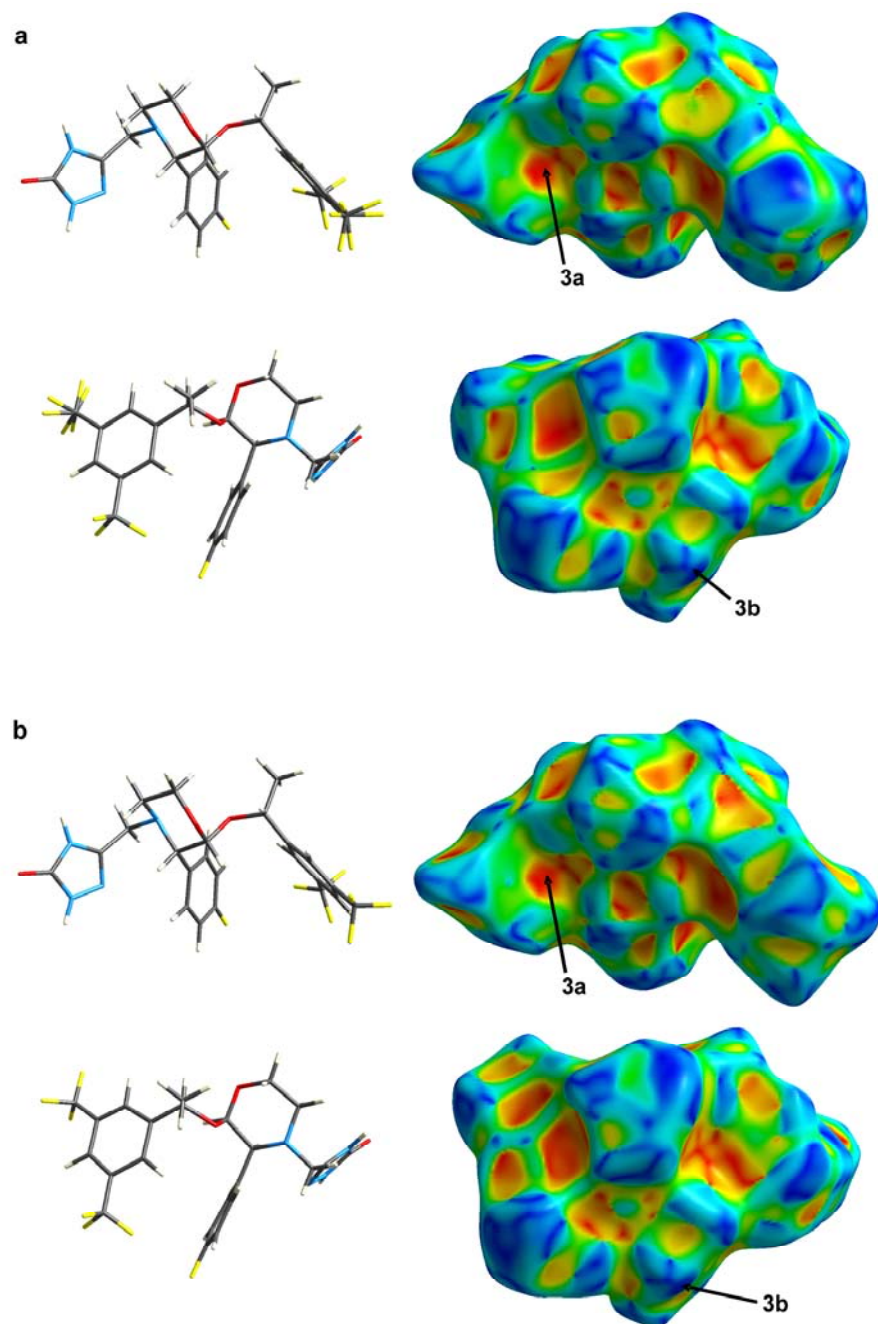

**Figure S4.** Hirshfeld surfaces for aprepitant polymorphs form I° (a) and form II (b). Shape index is mapped between -1.0 (red) and 1.0 (blue). Label: 3a C-H... $\pi$  acceptor and 3b C-H... $\pi$  donor.

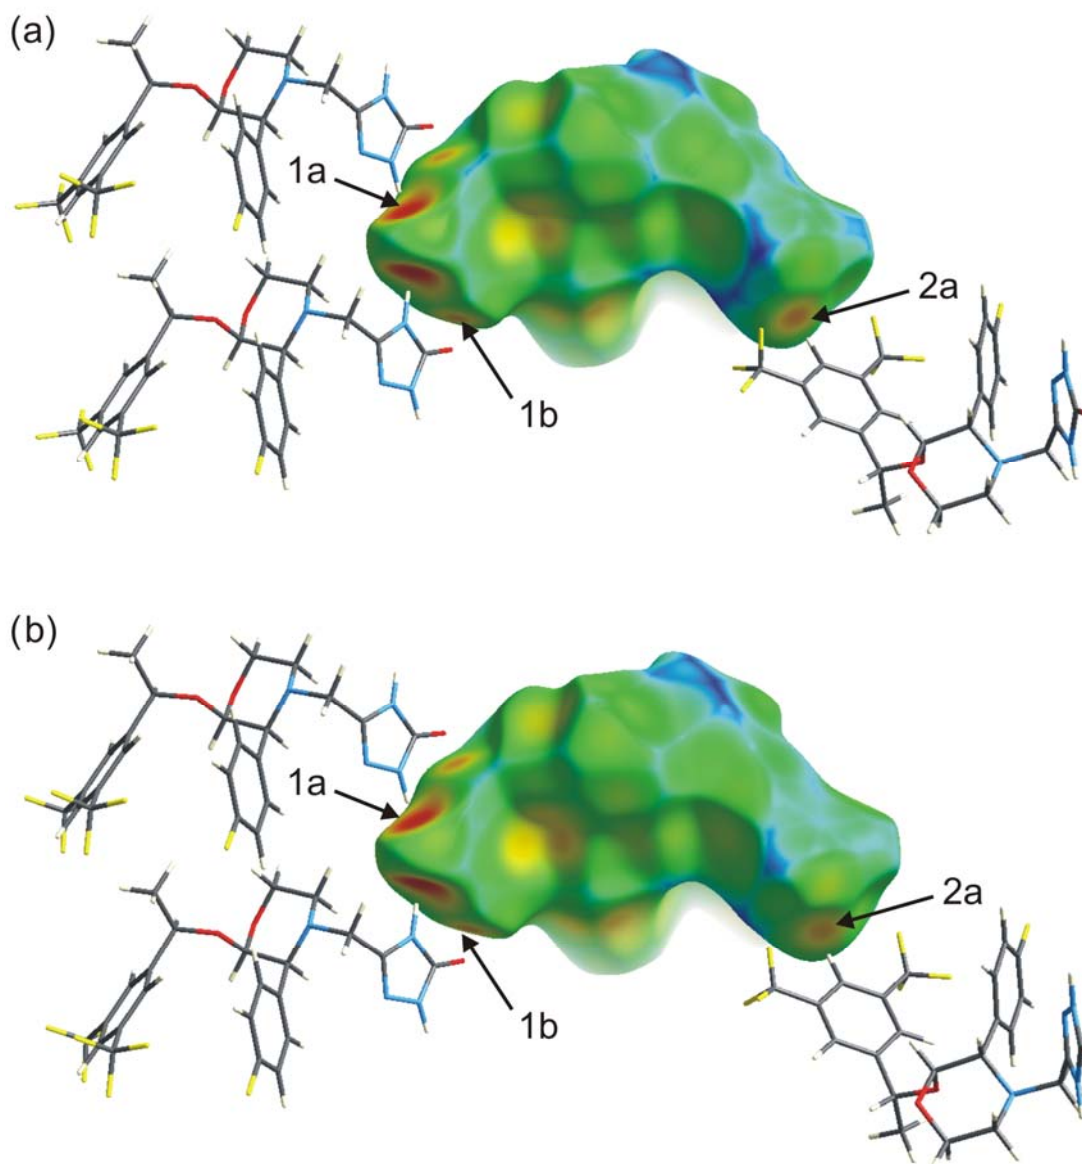

**Figure S5.** Hirshfeld surfaces of aprepitant modification I°, showing the two hypothetical “ordered” structures: (a)  $-\text{CF}_3$  group involving the atoms F4, F5, and F6; (b)  $-\text{CF}_3$  group involving the atoms F4A, F5A, and F6A.  $d_e$  Surfaces have been mapped between  $d_e$  0.73 and 2.7 Å. 1a marks the acceptor, 1b the donor of the stronger (shorter) of the two N-H...O hydrogen bonds. The label 2a marks the fluorine atom (F4/ F4A) of the C-H...F interaction. The weak colour difference of spot 2a indicates that the disorder of the  $\text{CF}_3$  group does not affect this interaction significantly.

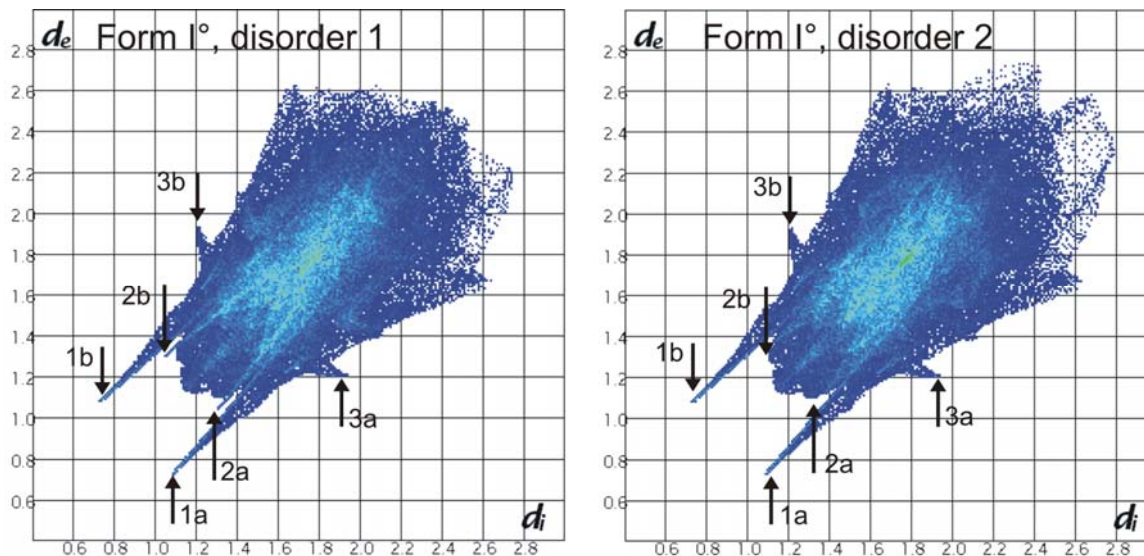

**Figure S6.** 2D fingerprint plots for the two hypothetical “ordered“ structures of form I°: (a)  $-\text{CF}_3$  group involving the atoms F4, F5, and F6; (b)  $-\text{CF}_3$  group involving the atoms F4A, F5A, and F6A.  $d_e$  and  $d_i$  are the distances to the nearest atom centre exterior and interior to the surface. In the separated modelled fingerprint plots the C(18)-H $\cdots$ F(4) interaction appears as sharp spikes, whereas the C(18)-H $\cdots$ F(4A) is not distinguishable from the other C-H $\cdots$ F interactions (see Table 3).

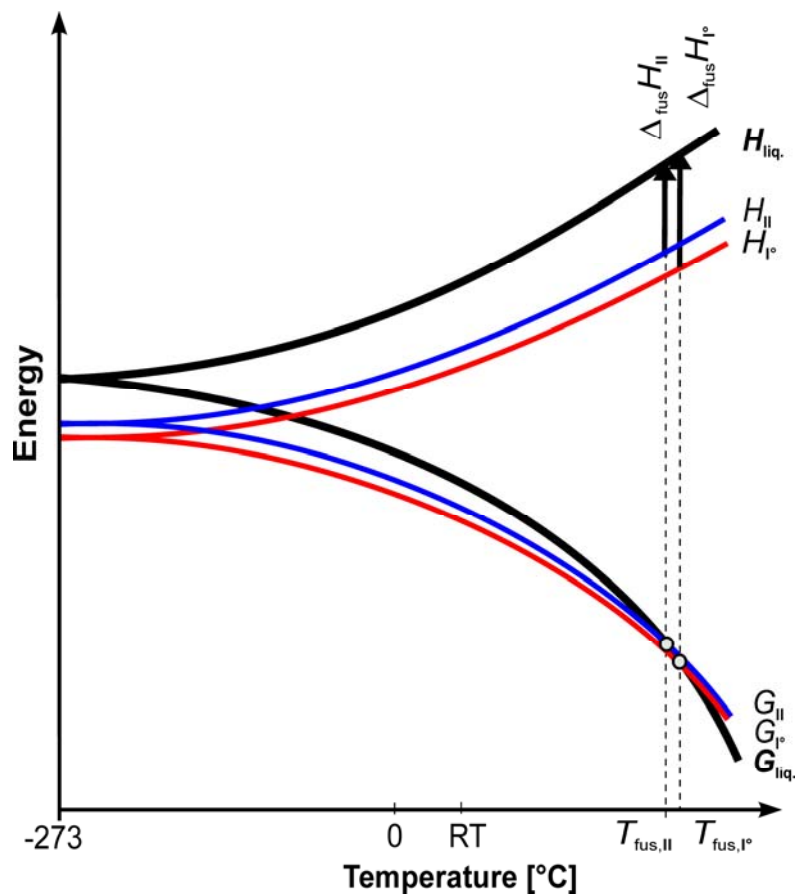

**Figure S7.** Semi-schematic energy/temperature diagram of the aprepitant polymorphs I° and II. *G*: Gibbs free energy, *H*: enthalpy,  $\Delta_{\text{fus}}H$ : enthalpy of fusion, liq: liquid phase (melt). The bold vertical arrows mark the experimentally measured enthalpies.
